# Supplementary material for: Are the 2005 Dietary Guidelines for Americans Associated With Reduced Risk of Type 2 Diabetes and Cardiometabolic Risk Factors? Twenty-year findings from the CARDIA study
Source: PubMed Central journal article supplement — Diabetes Care. 2011 Apr 20;34(5):1183–5. doi: 10.2337/dc10-2041 (PMC3114488; doi:10.2337/dc10-2041), 2011-04-20
Supplement: supp_dc10-2041v102041_DC102041SupplementaryData.pdf [file supp_dc10-2041v102041_DC102041SupplementaryData.pdf]

SUPPLEMENTARY DATA

**Supplementary Table 1. Baseline characteristics of CARDIA participants according to Diet Quality Index (DQI) score, 1985-86\***

| Characteristic                   | Blacks (n=2155) |             |            |             |            | Whites (n=2226) |            |            |  |  |
|----------------------------------|-----------------|-------------|------------|-------------|------------|-----------------|------------|------------|--|--|
|                                  | <40             | 40-50       | 50-60      | >60         | <40        | 40-50           | 50-60      | >60        |  |  |
| Number                           | 1007            | 591         | 328        | 229         | 490        | 517             | 504        | 715        |  |  |
| DQI score                        | 31.4 (5.9)      | 44.8 (2.8)  | 54.7 (2.8) | 67.9 (6.7)† | 32.9 (5.4) | 45.1 (2.8)      | 54.8 (3.0) | 70.9       |  |  |
| Age, years                       | 24.0 (3.7)      | 24.6 (3.7)  | 24.4 (3.8) | 25.3 (3.7)† | 24.9 (3.5) | 25.5 (3.4)      | 25.4 (3.3) | 25.8       |  |  |
| Education, years                 | 12.8 (1.7)      | 13.2 (1.8)  | 13.4 (1.9) | 13.9 (1.9)† | 13.8 (2.4) | 14.5 (2.4)      | 14.8 (2.3) | 15.3       |  |  |
| Physical activity score          | 378 (297)       | 379 (306)   | 357 (294)  | 390 (285)   | 416 (274)  | 446 (280)       | 458 (287)  | 473        |  |  |
| BMI, kg/m <sup>2</sup>           | 24.8 (5.6)      | 25.5 (5.8)  | 26.2 (5.7) | 26.4 (5.9)† | 24.1 (4.4) | 23.7 (4.0)      | 23.8 (4.2) | 23.3       |  |  |
| Male, %                          | 50.4            | 41.8        | 30.5       | 25.3†       | 65.7       | 56.1            | 45.4       | 28.9†      |  |  |
| Current smokers, %               | 36.4            | 32.8        | 23.5       | 16.6†       | 41.0       | 29.2            | 25.2       | 13.1†      |  |  |
| Income <\$25,000, %              | 50.3            | 43.8        | 42.7       | 38.0†       | 29.0       | 27.3            | 24.0       | 24.5†      |  |  |
| Income >\$50,000, %              | 10.5            | 17.3        | 16.2       | 19.7†       | 25.5       | 30.6            | 32.5       | 35.7†      |  |  |
| Average daily intake             |                 |             |            |             |            |                 |            |            |  |  |
| Total energy, kcal               | 3319 (1367)     | 2915 (1463) | 2400       | 2091        | 3228       | 2948            | 2508       | 2081       |  |  |
| Total fat, % of energy           | 41.2 (4.5)      | 37.1 (5.3)  | 35.3 (5.4) | 31.5        | 41.0 (4.5) | 39.0 (5.2)      | 37.1 (4.6) | 32.7       |  |  |
| Saturated fat, % of energy       | 15.7 (2.4)      | 13.8 (2.4)  | 12.9 (2.3) | 10.7(2.1)†‡ | 16.1 (2.5) | 15.0 (2.5)      | 14.1 (2.2) | 11.8       |  |  |
| Total carbohydrates, % of energy | 42.8 (5.8)      | 47.1 (6.8)  | 49.8 (7.4) | 55.0        | 41.3 (5.8) | 43.3 (6.5)      | 45.7 (5.6) | 50.8       |  |  |
| Cholesterol, mg/1000 kcal        | 201 (74)        | 168 (57)    | 154 (58)   | 131 (50)†   | 185 (61)   | 162 (55)        | 152 (46)   | 131 (55)†  |  |  |
| Dairy, reduced-fat§              | 0.1 (0.2)       | 0.2 (0.3)   | 0.4 (0.5)  | 0.5 (0.6)†‡ | 0.3 (0.4)  | 0.5 (0.5)       | 0.7 (0.6)  | 0.8 (0.7)† |  |  |
| Vegetables, total§               | 1.0 (0.5)       | 1.2 (0.6)   | 1.4 (0.9)  | 2.0 (1.4)†‡ | 1.2 (0.6)  | 1.4 (0.7)       | 1.7 (1.0)  | 2.4 (1.7)† |  |  |
| Sugar-sweetened beverages§       | 0.6 (0.6)       | 0.8 (0.8)   | 0.7 (0.8)  | 0.6 (0.7)†‡ | 0.6 (0.6)  | 0.5 (0.7)       | 0.4 (0.5)  | 0.2 (0.5)† |  |  |
| Candies, added sweeteners§       | 0.8 (0.7)       | 0.8 (0.8)   | 0.8 (0.9)  | 0.6 (0.7)†  | 0.9 (1.0)  | 0.7 (0.8)       | 0.6 (0.7)  | 0.5 (0.6)† |  |  |
| Fruit, total§                    | 0.8 (0.6)       | 1.3 (0.9)   | 1.8 (1.0)  | 2.7 (1.4)†‡ | 0.6 (0.4)  | 0.9 (0.6)       | 1.3 (0.8)  | 1.9 (1.1)† |  |  |
| 100% fruit juices§               | 0.5 (0.5)       | 0.8 (0.7)   | 1.1 (0.9)  | 1.6 (1.3)†‡ | 0.3 (0.3)  | 0.5 (0.5)       | 0.6 (0.6)  | 0.8 (0.8)† |  |  |
| Grains, total§                   | 2.6 (0.8)       | 2.6 (0.8)   | 2.5 (0.8)  | 2.5 (1.0)†‡ | 2.5 (0.7)  | 2.6 (0.8)       | 2.7 (0.8)  | 2.8 (0.9)† |  |  |
| Whole grains§                    | 0.3 (0.4)       | 0.5 (0.5)   | 0.6 (0.5)  | 0.8 (0.7)†‡ | 0.4 (0.3)  | 0.5 (0.5)       | 0.7 (0.6)  | 1.1 (0.7)† |  |  |
| Sodium, g/1000 kcal              | 1.5 (0.3)       | 1.4 (0.3)   | 1.4 (0.3)  | 1.3 (0.3)†‡ | 1.6 (0.3)  | 1.6 (0.3)       | 1.5 (0.3)  | 1.5 (0.3)  |  |  |

\*The DQI is based on the 2005 Dietary Guidelines for Americans. Scores range from 0-100, higher scores indicate a diet more consistent with the guidelines. Values are means (SD) or percent.

†Indicates statistically significant difference (Chi2 or ANOVA,  $\alpha=0.05$ ) across DQI categories within each race group.

‡Indicates significant difference in food intake between Blacks and Whites with high DQI score (>60)

§Servings/1000 kcal.

SUPPLEMENTARY DATA

**Supplementary Table 2. Adjusted mean change in cardio-metabolic risk factors from 1992-93 to 2005-06 according to DQI score categories\***

|                                              | Diet Quality Index Quartiles |                    |                     |                     | P for trend |
|----------------------------------------------|------------------------------|--------------------|---------------------|---------------------|-------------|
|                                              | 1 <sup>st</sup>              | 2 <sup>nd</sup>    | 3 <sup>rd</sup>     | 4 <sup>th</sup>     |             |
| Diastolic blood pressure, mm HG <sup>†</sup> | 5.15 (4.51, 5.78)            | 4.42 (3.79, 5.05)  | 2.51 (1.89, 3.13)   | 1.29 (0.67, 1.91)   | 0.01        |
| Systolic blood pressure, mm HG <sup>†</sup>  | 7.91 (6.74, 8.33)            | 7.54 (6.74, 8.33)  | 6.50 (5.71, 7.28)   | 4.42 (3.63, 5.21)   | 0.03        |
| HDL cholesterol, mg/dL <sup>‡</sup>          | -0.62 (-1.32, 0.08)          | 0.29 (-0.40, 0.98) | 0.89 (0.21, 1.57)   | 3.86 (3.19, 4.54)   | 0.02        |
| Triglycerides, mg/dL <sup>‡</sup>            | 15.4 (11.1, 19.8)            | 26.1 (21.8, 30.4)  | 25.4 (21.1, 29.6)   | 20.3 (16.1, 24.5)   | 0.90        |
| Fasting glucose, mg/dL <sup>§</sup>          |                              |                    |                     |                     |             |
| Blacks                                       | 8.80 (7.09, 10.51)           | 8.74 (6.85, 10.63) | 12.18 (9.86, 14.51) | 10.46 (7.15, 13.78) | 0.14        |
| Whites                                       | 8.34 (5.85, 10.83)           | 5.48 (3.36, 7.61)  | 6.47 (4.70, 8.24)   | 4.87 (3.32, 6.42)   | 0.08        |
| HOMA-insulin resistance <sup>  </sup>        |                              |                    |                     |                     |             |
| Blacks                                       | 0.70 (0.47, 0.92)            | 0.86 (0.59, 1.11)  | 1.35 (1.01, 1.69)   | 1.20 (0.77, 1.66)   | 0.01        |
| Whites                                       | 0.59 (0.28, 0.93)            | 0.52 (0.23, 0.78)  | 0.52 (0.28, 0.75)   | 0.48 (0.29, 0.69)   | 0.08        |

\*Values are means (95% confidence intervals). Estimates are from regression models adjusted for change in smoking from 1992-93 (year 7) to 2005-06 (year 20) and for the following trait values at the year 7 examination: age, gender, race, years of education, income, clinic of recruitment, physical activity score, and energy intake. The average of year 0 and year 7 diet data was used to calculate DQI scores and energy intake values.

<sup>†</sup>On the basis of 3,700 participants. Models further adjusted for blood pressure at year 7, family history of high blood pressure, and use of medications to control blood pressure.

<sup>‡</sup>On the basis of 3,627 participants. Models further adjusted for year 7 values of triglycerides or HDL cholesterol and use of medications to control cholesterol.

<sup>§</sup>On the basis of 3,320 participants. Models further adjusted for glucose at year 7, family history of diabetes, and use of medications to control blood glucose.

<sup>||</sup>On the basis of 3,116 participants. Models further adjusted for BMI and HOMA insulin resistance at year 7, family history of diabetes, and use of medications to control blood glucose.
